# Supplementary figures and images for: Insect Bite Hypersensitivity in Horses is Associated with Airway Hyperreactivity
Source: PubMed Central journal article supplement — J Vet Intern Med. 2017 Sep 18;31(6):1877–83. doi: 10.1111/jvim.14817 (PMC5697210; doi:10.1111/jvim.14817), 2017-09-18

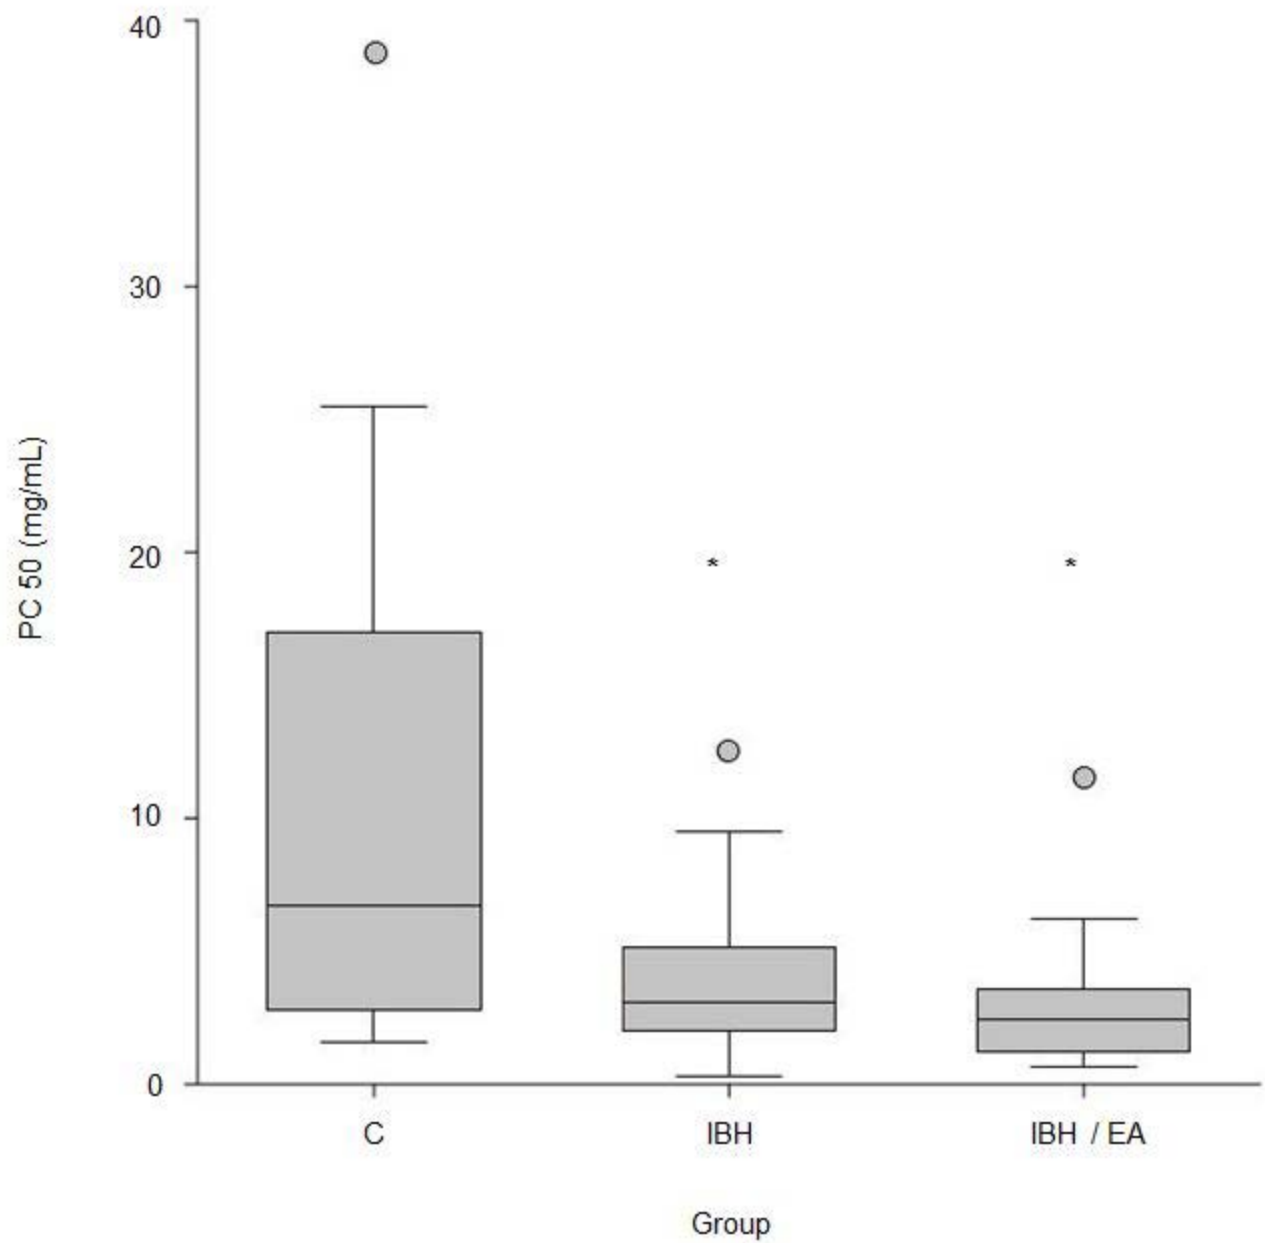

Supplement: JVIM-31-1877-s001.pdf [file JVIM-31-1877-s001.pdf]

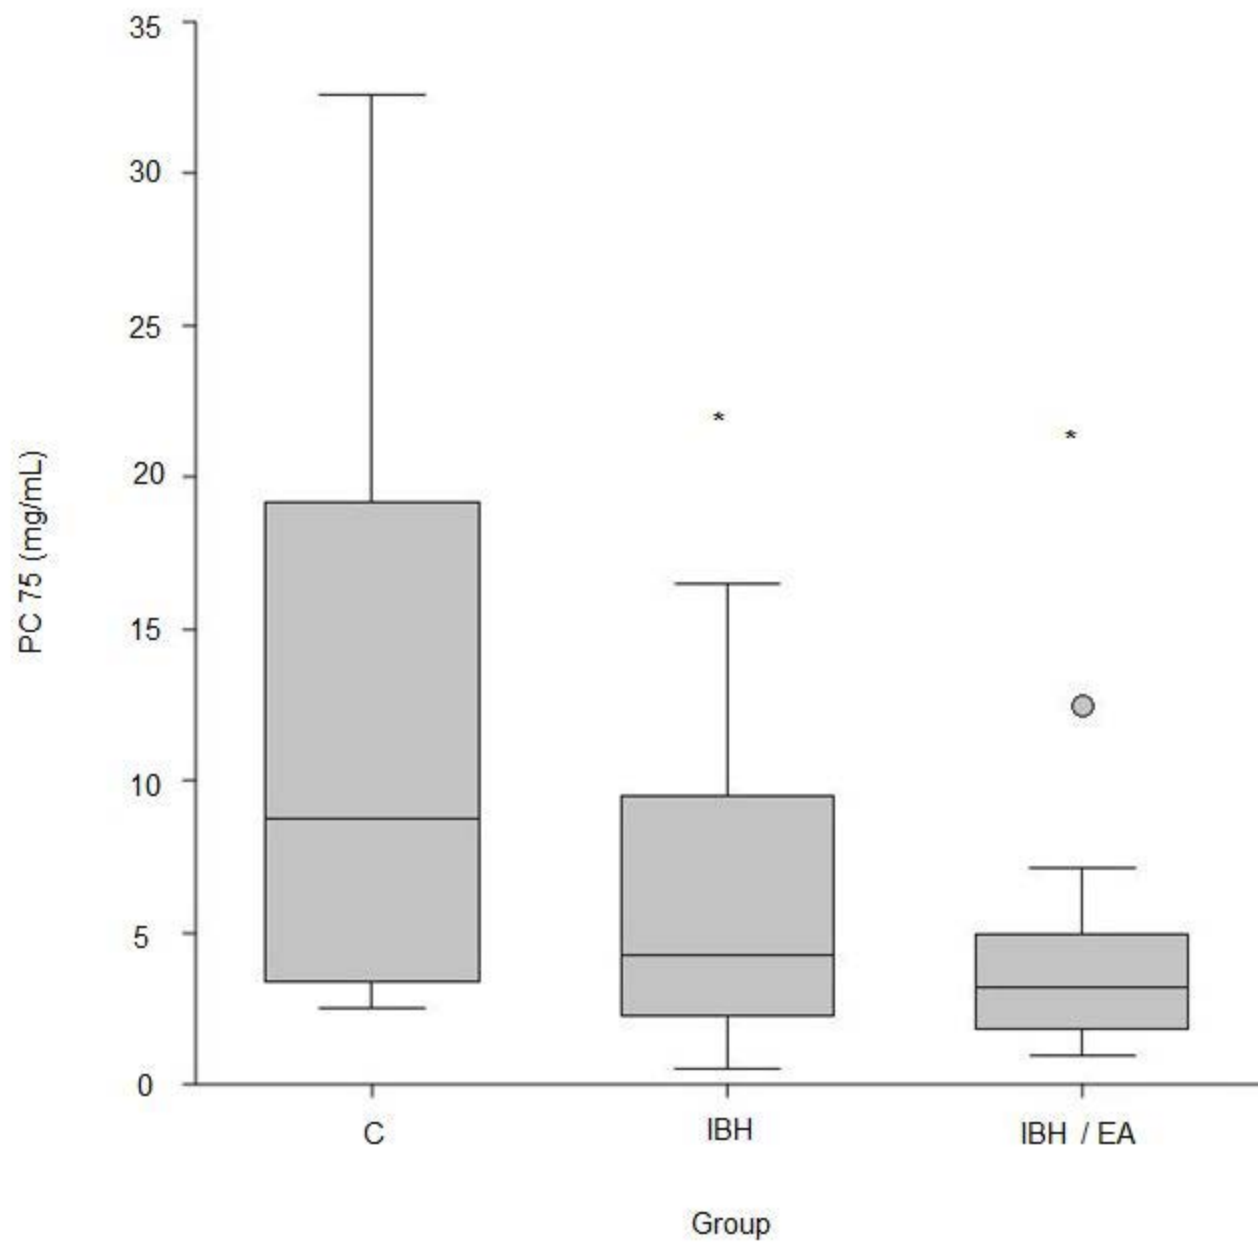

Supplement: JVIM-31-1877-s002.pdf [file JVIM-31-1877-s002.pdf]
